# Supplementary material
Source: HighWire-hosted journal article supplement (https://bmjopen.bmj.com/content/10/10/e038449)
Supplement: inline-supplementary-material-3 [file inline-supplementary-material-3.pdf]

**Supplementary file 3.** HSROC plot for subgroup analysis of echocardiographer expertise.**Subgroup Analysis:**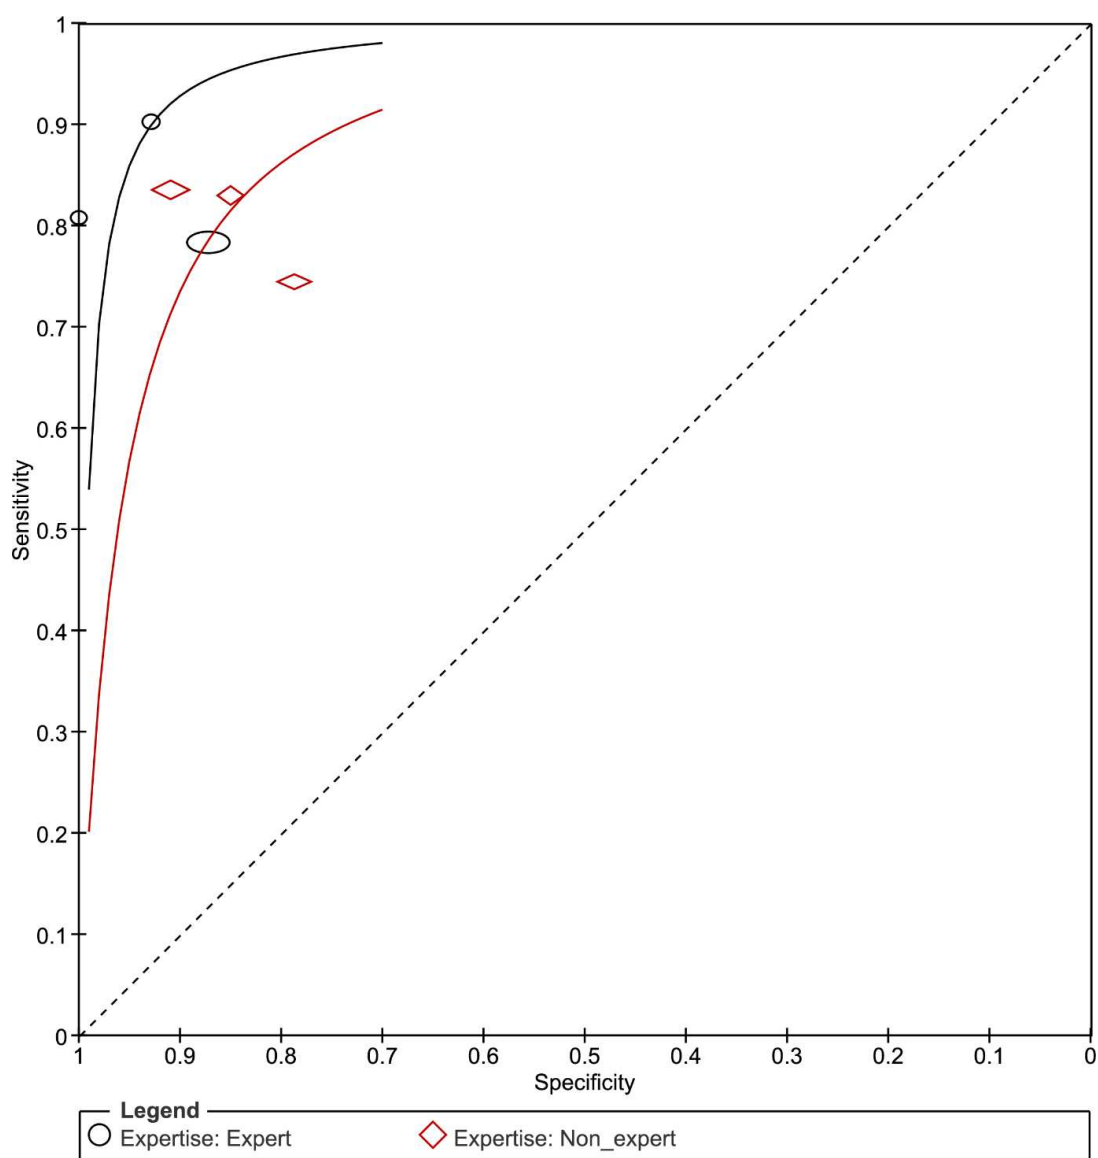

**Fig 7.** Summary ROC plot of sensitivity versus specificity of handheld echocardiography for any RHD according to echocardiographer expertise
